# Supplementary material for: Interactive coupling of a Greenland ice sheet model in NorESM2
Source: Copernicus journal article supplement (doi:10.5194/egusphere-2024-3045), 2025-01-07
Supplement: Supplementary file 1 [file egusphere-2024-3045-supplement.pdf]

1  
2  
3

## Additional figures and text.

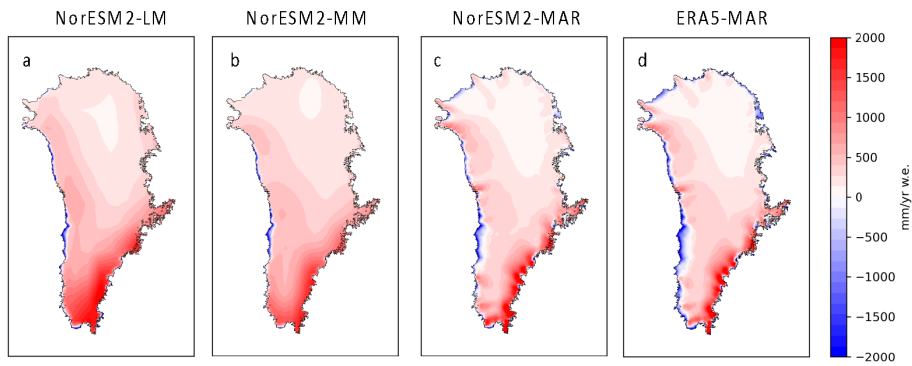

4  
5  
6  
7  
8

**Figure S1** Similar to Figure 5 but including results for NorESM2-LM-EC with 2° horizontal resolution of the atmosphere model. Mean surface mass balance over the period 1960-1989 from a) low-resolution NorESM2-LM-EC, b) NorESM2-MM-EC, c) NorESM2-MAR and d) ERA5-MAR). All fields are masked to the modelled ice sheet area in NorESM2 at the end of year 2014.
